# Supplementary material for: Developmental atlas of the indirect-developing sea urchin Paracentrotus lividus: From fertilization to juvenile stages
Source: PubMed Central journal article supplement (PMC9664562; doi:10.3389/fcell.2022.966408), 2022-10-31
Supplement: DataSheet1.pdf [file DataSheet1.pdf]

## SUPPLEMENTARY MATERIAL

### Supplementary Figures

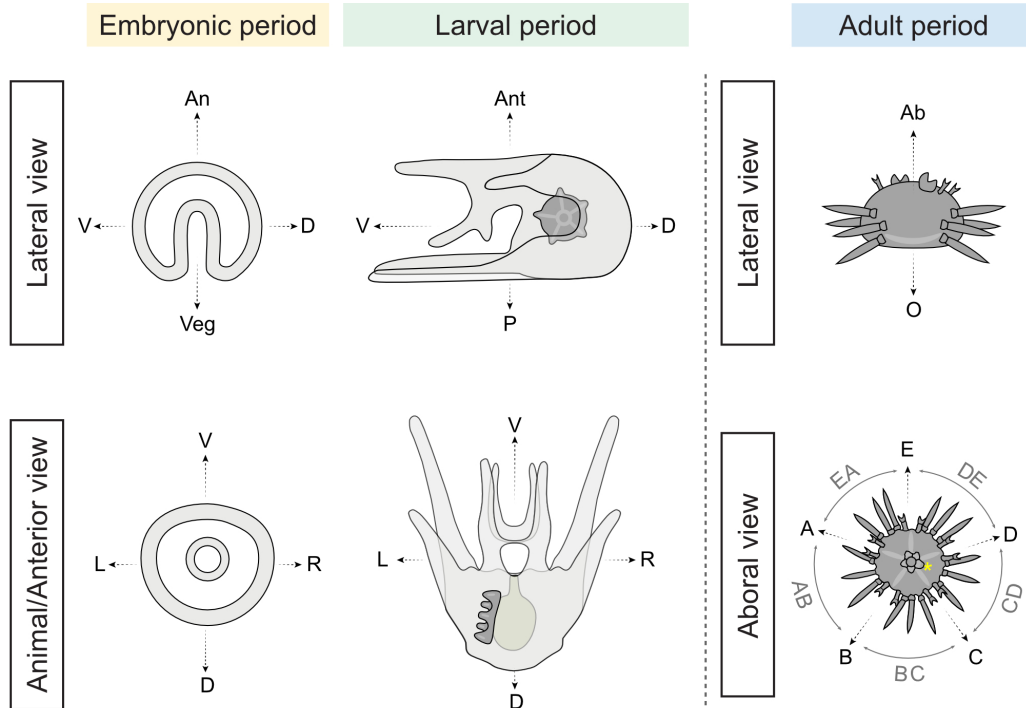

#### Supplementary Figure S1. Nomenclature of embryonic, larval, and juvenile axes.

Schematic representations of the terminology used to refer to the developmental axes of the embryos, larvae, and juveniles of *Paracentrotus lividus*. The embryonic period is represented by a mid-gastrula stage, the larval period by an 8-arm pluteus stage bearing a rudiment at the primary podia stage, and the adult period by an early juvenile stage. In the rudiment and the juvenile, the water vascular system is highlighted in light gray. In the juvenile, the pentaradial symmetry of the body plan is shown according to Carpenter's nomenclature (1884). Therefore, A, B, C, D, E correspond to the five axes delimited by the ambulacral fields, and AB, BC, CD, DE, EA correspond to the five interambulacral fields. Of note, the axes are indicated on the juvenile, in aboral view, using a counterclockwise Carpenter's nomenclature, as the original clockwise Carpenter's nomenclature was defined from observing the adult from the oral side (Carpenter, 1884; Paul and Hotchkiss, 2020). In the aboral view of the juvenile, the central disk of the aboral surface is further indicated: it is composed of 4 genital plates plus the madreporite (marked by a yellow asterisk). Ab: aboral; An: animal; Ant: anterior; D: dorsal; L: left; O: oral; P: posterior; R: right; V: ventral; Veg: vegetal.

A

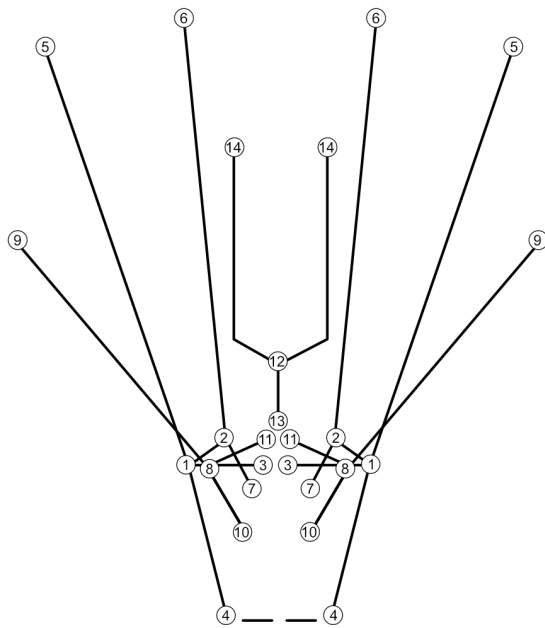

B

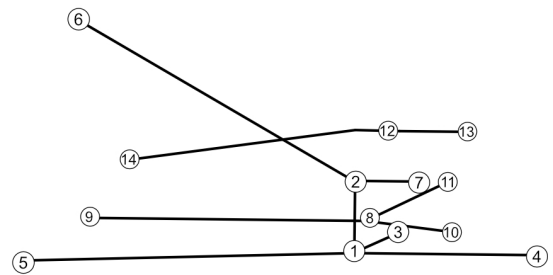

**Supplementary Figure S2. Larval skeletal rod nomenclature.** (A, B) Schematic representations of the skeletal rods of an 8-arm pluteus larva in anterior view, with the ventral side up and the left side to the left in (A), and in lateral view, with the ventral side to the left and the anterior side up in (B). Each rod is identified by two numbers marking its extremities. (1-2) dorsoventral connecting rods, (1-3) ventral transverse rods, (1-4) body rods, (1-5) postoral rods, (2-6) anterolateral rods, (2-7) recurrent rods, (8-9) posterodorsal rods, (8-10) anteroventral rods, (8-11) anterodorsal rods, (12-13) anteromedial rod, and (12-14) preoral rods.

| Period                | Stage                           | Defining characters                                                                                                                                                 |
|-----------------------|---------------------------------|---------------------------------------------------------------------------------------------------------------------------------------------------------------------|
| Cleavage              | 1-cell stage (zygote)           | The embryo has one cell                                                                                                                                             |
|                       | 2-cell stage                    | The embryo has two cells                                                                                                                                            |
|                       | 4-cell stage                    | The embryo has four cells                                                                                                                                           |
|                       | 8-cell stage                    | The embryo has eight cells                                                                                                                                          |
|                       | 16-cell stage                   | The embryo has sixteen cells                                                                                                                                        |
|                       | 28-cell stage                   | The embryo has twenty-eight cells                                                                                                                                   |
|                       | 32-cell stage                   | The embryo has thirty-two cells                                                                                                                                     |
|                       | 56-cell stage                   | The embryo has fifty-six cells                                                                                                                                      |
|                       | 60-cell stage                   | The embryo has sixty cells                                                                                                                                          |
| Embryonic<br>Blastula | very early blastula stage       | Cell tiers and embryonic axes are no longer distinguishable; the sole usable landmark is the timing of development after the 60-cell stage (i.e., 1 hour)           |
|                       | early blastula stage            | No specific morphological character; the sole usable landmark is the timing of development after the 60-cell stage (i.e., 2 hours)                                  |
|                       | mid-blastula stage              | No specific morphological character; the sole usable landmark is the timing of development after the 60-cell stage (i.e., 3 hours)                                  |
|                       | late blastula stage             | No specific morphological character; the sole usable landmark is the timing of development after the 60-cell stage (i.e., 4 hours)                                  |
|                       | hatched blastula stage          | The embryo hatches from the fertilization envelope                                                                                                                  |
|                       | swimming blastula stage         | The vegetal pole thickens                                                                                                                                           |
|                       | late swimming blastula stage    | The vegetal pole exhibits a "V" shape                                                                                                                               |
| Gastrulation          | early mesenchyme blastula stage | The skeletogenic mesoderm cells start to ingress                                                                                                                    |
|                       | late mesenchyme blastula stage  | All skeletogenic mesoderm cells have ingressed                                                                                                                      |
|                       | blastopore formation stage      | The blastopore becomes visible                                                                                                                                      |
|                       | early gastrula stage            | The archenteron is about one-third into the blastocoel; the lateral chains are formed                                                                               |
|                       | mid-gastrula stage              | The archenteron is half-way into the blastocoel; cells at the tip of the archenteron delaminate                                                                     |
|                       | late gastrula stage             | The archenteron reaches the blastocoel roof                                                                                                                         |
|                       | prism stage                     | The embryo has a triangular shape                                                                                                                                   |
| Larval                | early pluteus stage             | The mouth opens                                                                                                                                                     |
|                       | 2-arm pluteus stage             | The postoral arms are apparent                                                                                                                                      |
|                       | 4-arm pluteus stage             | The anterolateral arms are apparent                                                                                                                                 |
|                       | 6-arm pluteus stage             | The posterodorsal arms are apparent                                                                                                                                 |
|                       | 8-arm pluteus stage             | The preoral arms are apparent                                                                                                                                       |
|                       | competent pluteus stage         | The vestibular pore is open; the larval arm epidermis has started to shrink; epaulette beating is reduced; one primary podium protrudes outside the vestibular pore |
|                       | metamorphosis                   | Metamorphosis is triggered                                                                                                                                          |
| Adult                 | early juvenile stage            | The juvenile does not have an open mouth                                                                                                                            |
|                       | late juvenile stage             | The juvenile has a functional digestive tract, but no reproductive organs                                                                                           |
|                       | adult stage                     | Sexual maturity is reached                                                                                                                                          |

| Coeloms and Adult rudiment stage | Defining characters                                                                                                          |
|----------------------------------|------------------------------------------------------------------------------------------------------------------------------|
| hydroporic canal stage           | The hydroporic canal is formed                                                                                               |
| constricted coelomic pouch stage | Constrictions are present in the elongated coelomic pouches                                                                  |
| stone canal stage                | The stone canal is apparent                                                                                                  |
| vestibule invagination stage     | The vestibule starts to invaginate                                                                                           |
| vestibule contact stage          | The vestibular floor makes contact with the left hydrocoel                                                                   |
| vestibule flattened stage        | The vestibular floor is flat                                                                                                 |
| vestibule waving stage           | The apical surface of the vestibular floor is exhibiting folds; the left hydrocoel displays a pentaradial symmetry           |
| 5-fold mesoderm stage            | The left hydrocoel is folded, but not the basal surface of the vestibular floor                                              |
| 5-fold ectoderm stage            | The left hydrocoel and the basal surface of the vestibular floor are folded                                                  |
| primary podia stage              | The primary podia are apparent                                                                                               |
| primary podia touching stage     | The tips of the primary podia touch each other                                                                               |
| primary podia twisting stage     | The primary podia twist within the vestibular cavity                                                                         |
| primary podia papilla stage      | The papilla at the tip of the primary podia is formed                                                                        |
| juvenile spine stage             | The juvenile spines have emerged                                                                                             |
| mature rudiment stage            | The adult rudiment is larger than the larval stomach; the juvenile spines are about half the length of the definitive spines |

**Supplementary Figure S3. Defining characters for the *Paracentrotus lividus* staging scheme.** As in Figure 3, since development of the coeloms and the adult rudiment proceeded in parallel to that of the larva, the events related to the development of the coeloms and the adult rudiment are provided in the subsection in the right panel, in parallel to the 4-, 6-, and 8-arm pluteus stages.

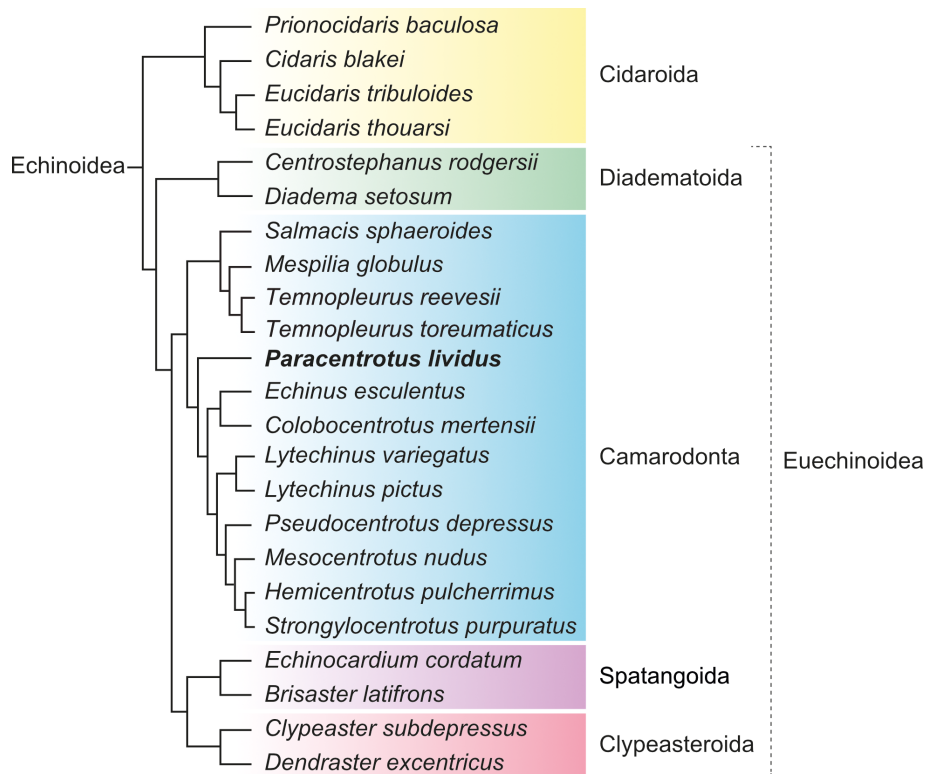

**Supplementary Figure S4. Phylogenetic relationship of echinoid species and groups referred to in the discussion.** The tree is based on Mongiardino Koch et al., 2018, Lin et al., 2020, and the World Register of Marine Species (WoRMS) (Horton et al., 2022). The cidaroids form an independent clade and are the sister group of all other echinoids, which are called the euechinoids.

## Supplementary Videos

**Supplementary Video S1. Larval swallowing.** Movie showing the muscular movements at the level of the esophagus and the cardiac sphincter in a 4-arm pluteus stage larva shown in lateral view. Cs: cardiac sphincter; Es: esophagus.

**Supplementary Video S2. Axocoel pumping.** Movie showing the activity of the left axocoel in a larva bearing an adult rudiment at the primary podia papilla stage in anterior view. The black arrow marks the left axocoel. Es: esophagus; St: stomach.

**Supplementary Video S3. Circulating coelomocytes.** Movie showing coelomocytes moving back and forth in the ring and radial canals of the water vascular system in a larva bearing an adult rudiment at the primary podia papilla stage in left, deep view.

**Supplementary Video S4. Podia motility.** Movie showing the motility of the primary podia within the vestibular cavity in a larva bearing an adult rudiment at the primary podia papilla stage in left, deep view.

**Supplementary Video S5. Pedicellaria opening and closing movement.** Movie showing the opening and closing movements of the three jaws of a pedicellaria on the aboral surface of a larva at the 8-arm pluteus stage.

**Supplementary Video S6. *Paracentrotus lividus* metamorphosis.** Movie showing a *Paracentrotus lividus* larva undergoing metamorphosis. The ventral side of the larva, marked by the position of the larval arms, is directed towards the bottom left corner. The vestibular pore is on the opposite side.

**Supplementary Video S7. Aristotle's lantern motility.** Movie showing the motility of Aristotle's lantern and of the teeth in an 8-day post-metamorphic juvenile in oral view.

### Supplementary References

- Carpenter, P. H. (1884). Report upon the Crinoidea collected during the voyage of H.M.S. Challenger during the years 1873-76. Part I: General morphology, with descriptions of the stalked crinoids. *Rep. Sci. Results Explor. Voyage H.M.S. Challenger, Zoology* 11, 1–442.
- Horton, T., Kroh, A., Ahyong, S., Bailly, N., Bieler, R., Boyko, C. B., et al. (2022). World Register of Marine Species (WoRMS). Available at: <https://www.marinespecies.org> (Accessed 04 2022, 20).
- Lin, J.-P., Tsai, M.-H., Kroh, A., Trautman, A., Machado, D. J., Chang, L.-Y., et al. (2020). The first complete mitochondrial genome of the sand dollar *Sinaechinocyamus mai* (Echinoidea: Clypeasteroidea). *Genomics* 112, 1686–1693. doi:10.1016/j.ygeno.2019.10.007
- Mongiardino Koch, N., Coppard, S. E., Lessios, H. A., Briggs, D. E. G., Mooi, R., and Rouse, G. W. (2018). A phylogenomic resolution of the sea urchin tree of life. *BMC Evol. Biol.* 18, 189. doi: 10.1186/s12862-018-1300-4.
- Paul, C. R. C., and Hotchkiss, F. H. C. (2020). Origin and significance of Lovén's Law in echinoderms. *J. Paleontol.* 94, 1089–1102. doi: 10.1017/jpa.2020.31.
